# Supplementary material for: Inter-Alpha Inhibitor Proteins Modify the Microvasculature after Exposure to Hypoxia–Ischemia and Hypoxia in Neonatal Rats
Source: MDPI journal article supplement (doi:10.3390/ijms24076743), 2023-04-04
Supplement: s1 [file s1]

# Inter-Alpha Inhibitor Proteins Modify the Microvasculature after Exposure to Hypoxia–Ischemia and Hypoxia in Neonatal Rats

Francesco Girolamo <sup>1</sup>, Yow-Pin Lim <sup>2,3</sup>, Daniela Virgintino <sup>1</sup>, Barbara S. Stonestreet <sup>4</sup> and Xiaodi F. Chen <sup>4,\*</sup>

<sup>1</sup> Department of Translational Biomedicines and Neuroscience (DiBrainN), University of Bari School of Medicine, 70124 Bari, Italy

<sup>2</sup> ProThera Biologics, Inc., Providence, RI 02905, USA

<sup>3</sup> Department of Pathology and Laboratory Medicine, Alpert Medical School of Brown University, Providence, RI 02905, USA

<sup>4</sup> Women & Infants Hospital of Rhode Island, Alpert Medical School of Brown University, Providence, RI 02905, USA

\* Correspondence: xchen@wihri.org; Tel.: +1-(401)-274-1122 (ext. 48025)

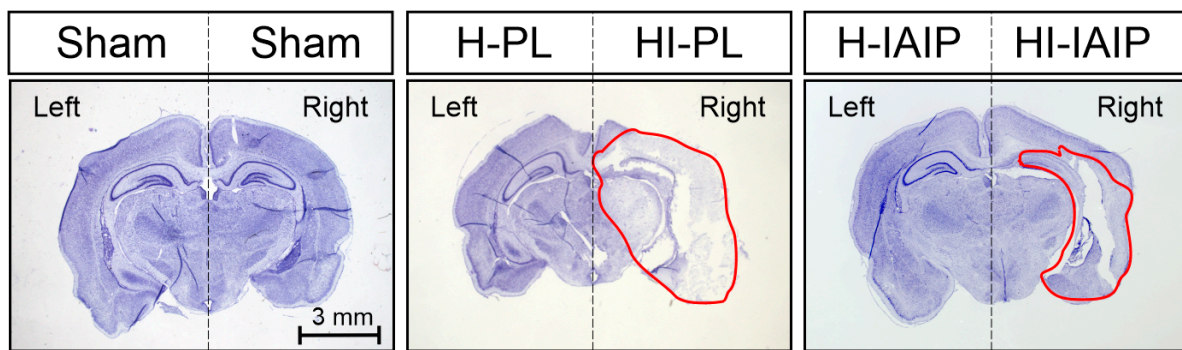

**Supplementary Figure S1:**

Representative cresyl violet images of the coronal brain sections from the Sham, H/PL, HI-PL, and H/IAIP groups stained with cresyl violet 3 days after HI brain injury. Infarct areas were contoured with the red line. Scale bar = 3 mm. This Nissl-stained image is distinct from previous published Nissl images [1], which were obtained from neonatal rats using the same hypoxic-ischemic and hIAIP treatment procedures as in the current study.

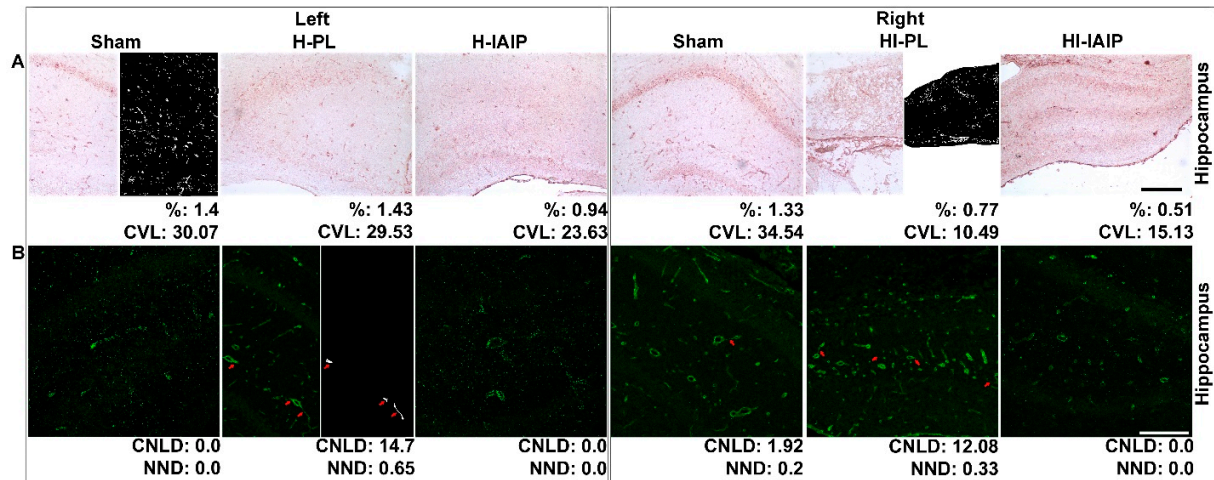

### Supplementary Figure S2:

Representative images used in the quantitative analyses comparing sham-operated, hypoxia (H, left side of brain) and hypoxia-ischemia (HI, right side of brain) in a male neonatal rat brain vasculature.

A) Representative laminin immunohistochemical labeling and thresholded binary images of coronal hippocampal sections (acquired with a 10x lens light microscope) used to automatically measure the percent (%) of the laminin-stained area and the cumulative laminin<sup>+</sup> vessel length (CVL: expressed as multiples of 100  $\mu\text{m}$  of vessel length)/area (1  $\text{mm}^2$ ). Scale bar: 250  $\mu\text{m}$ ; field total area 975,440  $\mu\text{m}^2$ .

B) Representative immunofluorescence confocal laminin immunolabeling and thresholded binary images of coronal hippocampal sections (acquired with a 40x lens confocal microscope) used to localize (red arrows) and automatically measure the cumulative laminin<sup>+</sup> nanotube linear density (CNLD: expressed in  $\mu\text{m}/\text{acquired volume}$  expressed as  $10^6 \mu\text{m}^3$ ) and the nanotube numerical density (NND: number of identified nanotubes/acquired volume). Scale bar: 100  $\mu\text{m}$ ; field total volume 1.201  $10^6 \mu\text{m}^3$ .

### References:

- Chen, X.; Nakada, S.; Donahue, J. E.; Chen, R. H.; Tucker, R.; Qiu, J.; Lim, Y. P.; Stopa, E. G.; Stonestreet, B. S., Neuroprotective effects of inter-alpha inhibitor proteins after hypoxic-ischemic brain injury in neonatal rats. *Exp Neurol* **2019**, 317, 244-259.
